# Supplementary material for: Co-administration of either curcumin or resveratrol with cisplatin treatment decreases hepatotoxicity in rats via anti-inflammatory and oxidative stress-apoptotic pathways
Source: PeerJ. 2024 Jul 22;12:e17687. doi: 10.7717/peerj.17687 (PMC11271648; doi:10.7717/peerj.17687)
Supplement: Supplemental Information 1 [file peerj-12-17687-s001.xls]

## Sheet: Cisplatin
		Liver function tests							Oxidative/antioxidative stress parameters								Serum inflammatory markers levels							Liver fibrosis and apoptosis markers
		ALT [U/L]							SOD [ng/ml]								IL-1β [pg/ml]							Collagen percentage in central vein region [μm]2
		Mean	Group I	Group II	Group III	Group IV			Mean	Group I	Group II	Group III	Group IV				Mean	Group I	Group II	Group III	Group IV			Mean	Group I	Group II	Group III	Group IV
			Control	Cisplatin	Cisplatin+Curcumin	Cisplatin +resveratrol				Control	Cisplatin	Cisplatin+Curcumin	Cisplatin +resveratrol					Control	Cisplatin	Cisplatin+Curcumin	Cisplatin +resveratrol				Control	Cisplatin	Cisplatin+Curcumin	Cisplatin +resveratrol
		1	30	82	51	52			1	7.06	3.31	5.13	4.74				1	91.06	217.31	126.7	138.31			1	1.36	3.57	2.57	2.31
		2	28	99	41	41			2	7.35	3.29	6.38	4.45				2	85.4	229	103.5	104.5			2	1.35	3.529	1.7	2.45
		3	29	78	55	45			3	6.25	2.35	5.72	5.59				3	67.1	234.6	106.4	115.9			3	1.25	3.35	2.1	1.59
		4	27	85	46	48			4	8.25	2.54	5.85	6.65				4	81.4	254	111.5	106.4			4	1.17	3.54	1.85	1.65
		5	28	66	48	39			5	8.12	4.04	4.98	4.38				5	82.9	240	99.8	113.8			5	1.28	3.4	1.98	2.38
		6	31	86	38	54			6	6.89	2.45	4.77	5.35				6	97.6	245	125.4	104.8			6	1.39	3.45	1.77	1.74
		7	32	57	39	51			7	5.58	2.31	4.83	6.55				7	85.3	231	118	105.3			7	1.23	3.31	2.83	1.55
		8	33	91	42	46			8	7.58	3.25	5.75	5.49				8	75.1	225	126	114.6			8	1.15	3.25	2.75	2.49
		9	25	75	41	39			9	8.23	3.82	5.35	4.99				9	81.5	201.4	135.9	98.6			9	1.08	3.65	2.17	2.14
		10	26	71	59	43			10	5.93	4.51	6.92	4.45				10	77.6	251	128.6	94.7			10	1.12	3.751	1.92	2.45
		Mean	28.9	79	46	45.8			Mean	7.124	3.187	5.568	5.264				Mean	82.496	232.831	118.18	109.691			Mean	1.238	3.48	2.164	2.075
		SD	2.60128	12.3468	7.13364	5.39135			SD	0.964621	0.770268	0.698376	0.829715				SD	8.40525	15.9479	12.2256	12.144			SD	0.107373	0.157213	0.41075	0.395762
		SE	0.822598	3.90441	2.25586	1.70489			SE	0.30504	0.24358	0.220846	0.262379				SE	2.65797	5.04316	3.86609	3.84029			SE	0.0339542	0.049715	0.129891	0.125151
				AST [U/L]							GPX [ng/ml]								IL-6 [pg/ml]					Collagen percentage in portal region [μm]2
		Mean	Group I	Group II	Group III	Group IV			Mean	Group I	Group II	Group III	Group IV				Mean	Group I	Group II	Group III	Group IV			Mean	Group I	Group II	Group III	Group IV
			Control	Cisplatin	Cisplatin+Curcumin	Cisplatin +resveratrol				Control	Cisplatin	Cisplatin+Curcumin	Cisplatin +resveratrol					Control	Arsenic	Arsenic+Curcumin	Arsenic +omega3				Control	Cisplatin	Cisplatin+Curcumin	Cisplatin +resveratrol
		1	22	88	53	48			1	6.82	2.81	3.84	4.28				1	1.51	2.74	1.81	1.76			1	1.328	3.925	2.85	2.45
		2	26	90	40	43			2	7.35	3.19	3.17	5.45				2	1.35	2.29	1.71	1.45			2	1.135	3.629	2.7	2.45
		3	31	84	39	50			3	6.25	2.35	4.24	4.59				3	1.25	2.35	2.11	1.59			3	1.425	2.735	2.3	2.59
		4	27	76	39	39			4	7.11	3.14	3.85	5.15				4	1.1	2.54	1.85	1.65			4	1.21	3.454	2.57	2.65
		5	28	72	37	38			5	6.28	2.49	3.98	5.38				5	1.28	2.4	1.98	1.38			5	1.47	4.74	2.698	1.96
		6	31	61	42	54			6	6.23	2.45	3.77	4.41				6	1.3	2.45	1.77	1.4			6	1.53	3.545	2.84	2.4
		7	29	57	36	41			7	5.91	2.31	4.83	5.55				7	1.23	2.31	1.83	1.55			7	1.23	2.631	2.83	2.125
		8	22	91	42	42			8	6.34	2.25	3.75	5.49				8	1.15	2.25	1.75	1.49			8	1.15	3.57	2.375	2.49
		9	25	77	41	41			9	7.68	3.05	4.36	4.98				9	1.38	2.84	1.64	1.69			9	1.29	4.35	2.81	1.87
		10	26	81	51	43			10	6.32	2.51	4.92	4.25				10	1.32	2.51	1.92	1.45			10	1.46	3.451	2.94	2.31
		Mean	26.7	77.7	42	43.9			Mean	6.629	2.655	4.071	4.953				Mean	1.287	2.468	1.837	1.541			Mean	1.3228	3.603	2.6913	2.33167
		SD	3.19896	11.6814	5.63718	5.13052			SD	0.578589	0.360224	0.529663	0.525717				SD	0.116433	0.195038	0.13736	0.12888			SD	0.141984	0.641448	0.21356	0.278343
		SE	1.0116	3.69399	1.78263	1.62241			SE	0.182966	0.113913	0.167494	0.166246				SE	0.0368194	0.0616766	0.0434371	0.0407554			SE	0.0448993	0.202844	0.0675337	0.0880199
		ALP [mg/dl]							CAT [ng/ml]								IL-10 [pg/ml]							caspase-3 immune expression in central vein region [μm]2
		Mean	Group I	Group II	Group III	Group IV			Mean	Group I	Group II	Group III	Group IV				Mean	Group I	Group II	Group III	Group IV			Mean	Group I	Group II	Group III	Group IV
			Control	Cisplatin	Cisplatin+Curcumin	Cisplatin +resveratrol				Control	Cisplatin	Cisplatin+Curcumin	Cisplatin +resveratrol					Control	Cisplatin	Cisplatin+Curcumin	Cisplatin +resveratrol				Control	Cisplatin	Cisplatin+Curcumin	Cisplatin +resveratrol
		1	51	125	85	81			1	154.64	82.6	98.34	127.9				1	104.64	52.36	78.34	72.9			1	0.82	2.81	1.21	1.16
		2	65	114	69	69			2	165.25	79.229	107.3	132.5				2	99.34	32.29	77.14	75.14			2	0.74	2.91	1.71	1.45
		3	55	121	59	72			3	155.25	77.635	112.25	115.39				3	103.54	65.21	65.3	59.41			3	0.85	3.35	1.39	1.59
		4	63	110	84	84			4	151.1	82.54	98.35	111.31				4	95.36	71.35	79.74	65.28			4	0.61	2.54	1.65	1.65
		5	51	100	83	80			5	165.28	84.2	89.298	120.18				5	91.35	42.31	63.88	83.61			5	0.88	2.4	1.68	1.38
		6	68	120	77	71			6	162.3	86.45	107.27	110.36				6	110.3	43.21	85.36	81.65			6	0.73	2.45	1.77	1.4
		7	49	105	82	59			7	149.63	76.331	108.83	105.25				7	111.54	36.48	83.48	57.18			7	0.63	3.31	1.583	1.55
		8	72	117	76	77			8	150.15	69.25	107.65	104.29				8	103.69	51.35	75.84	89.39			8	0.75	3.25	1.75	1.49
		9	69	109	89	81			9	147.85	73.85	92.48	119.82				9	102.35	47.64	91.36	72.38			9	0.68	3.56	1.35	1.27
		10	66	131	71	67			10	159.32	84.351	111.92	114.15				10	107.28	39.78	87.28	76.31			10	0.71	3.51	1.42	1.45
		Mean	60.9	115.2	77.5	74.1			Mean	156.077	79.6436	103.369	116.115				Mean	102.939	48.198	78.772	73.325			Mean	0.74	3.009	1.5513	1.439
		SD	8.55635	9.47277	9.07071	7.85211			SD	6.58262	5.40729	8.15037	9.16563				SD	6.28817	12.3548	8.89482	10.3573			SD	0.0893184	0.443758	0.194386	0.146776
		SE	2.70576	2.99555	2.86841	2.48305			SE	2.08161	1.70994	2.57737	2.89843				SE	1.9885	3.90694	2.81279	3.27526			SE	0.028245	0.140329	0.0614701	0.0464148
		Serum T billirubin							MDA [ng/ml wet tissue]								TNF-α [ng/l]							caspase-3 immune expression in portal region [μm]2
		Mean	Group I	Group II	Group III	Group IV			Mean	Group I	Group II	Group III	Group IV				Mean	Group I	Group II	Group III	Group IV			Mean	Group I	Group II	Group III	Group IV
			Control	Cisplatin	Cisplatin+Curcumin	Cisplatin +resveratrol				Control	Cisplatin	Cisplatin+Curcumin	Cisplatin +resveratrol					Control	Cisplatin	Cisplatin+Curcumin	Cisplatin +resveratrol				Control	Cisplatin	Cisplatin+Curcumin	Cisplatin +resveratrol
		1	0.47	0.73	0.51	0.5			1	76.06	298.34	113.25	107.25				1	112.14	236.57	145.39	139.72			1	0.723	4.02	1.75	1.59
		2	0.41	0.82	0.49	0.47			2	79.25	291	117.2	104.35				2	125.36	245.8	155.36	145			2	0.65	3.38	1.7	1.65
		3	0.44	0.71	0.48	0.48			3	85.14	285	120.3	115.19				3	114.73	235.36	150.3	159			3	0.85	3.35	2.2	1.61
		4	0.45	0.69	0.52	0.51			4	77.36	294	118.25	106.35				4	127.05	254.74	147.85	165			4	0.74	2.54	1.85	1.35
		5	0.39	0.71	0.51	0.49			5	82.15	270	119.8	113.68				5	137.15	240.34	138.98	138			5	0.82	3.65	1.98	1.78
		6	0.43	0.72	0.52	0.51			6	65.84	265	117.27	114.3				6	130.25	245.05	141.77	140			6	0.93	2.91	1.77	1.44
		7	0.46	0.62	0.48	0.48			7	84.12	281	108.23	105.95				7	133.28	220.15	128.83	159.61			7	0.86	4.25	1.83	1.36
		8	0.45	0.73	0.49	0.45			8	92.36	289	107.25	104.29				8	119.87	219.54	135.98	149			8	0.815	2.81	1.21	1.43
		9	0.46	0.69	0.53	0.51			9	84.36	273	110.36	99.25				9	102.36	204.36	122.58	134.92			9	0.73	3.98	1.05	1.27
		10	0.48	0.65	0.51	0.52			10	97.25	268	111.59	101.45				10	1.9.65	251.39	139.92	155.45			10	0.8632	3.15	1.92	1.45
		Mean	0.444	0.707	0.504	0.492			Mean	82.389	281.434	114.35	107.206				Mean	122.466	235.33	140.696	148.57			Mean	0.806467	3.404	1.726	1.493
		SD	0.0275681	0.053135	0.0177639	0.0220101			SD	8.71682	11.8218	4.82558	5.49124				SD	11.1804	16.0011	9.8681	10.5971			SD	0.085325	0.567533	0.34632	0.158679
		SE	0.0087178	0.0168028	0.00561743	0.0069602			SE	2.7565	3.73838	1.52598	1.73648				SE	3.53554	5.05998	3.12057	3.3511			SE	0.0269821	0.17947	0.109516	0.0501786
		Serum D billirubin
		Mean	Group I	Group II	Group III	Group IV
			Control	Cisplatin	Cisplatin+Curcumin	Cisplatin +resveratrol
		1	0.11	0.21	0.129	0.147
		2	0.135	0.229	0.171	0.162
		3	0.125	0.235	0.142	0.151
		4	0.119	0.254	0.135	0.165
		5	0.121	0.24	0.138	0.146
		6	0.133	0.245	0.177	0.177
		7	0.123	0.231	0.183	0.162
		8	0.115	0.225	0.175	0.151
		9	0.142	0.231	0.143	0.143
		10	0.132	0.251	0.152	0.149
		Mean	0.1255	0.2351	0.1545	0.1553
		SD	0.00989107	0.0130593	0.0200236	0.0107399
		SE	0.00312783	0.0041297	0.00633202	0.00339624
		Serum I bilirubin
		Mean	Group I	Group II	Group III	Group IV
			Control	Cisplatin	Cisplatin+Curcumin	Cisplatin +resveratrol
		1	0.36	0.52	0.381	0.353
		2	0.275	0.591	0.319	0.308
		3	0.315	0.475	0.338	0.329
		4	0.331	0.436	0.385	0.345
		5	0.269	0.47	0.372	0.344
		6	0.297	0.475	0.343	0.333
		7	0.337	0.389	0.297	0.318
		8	0.335	0.505	0.315	0.299
		9	0.318	0.459	0.387	0.367
		10	0.348	0.399	0.358	0.371
		Mean	0.3185	0.4719	0.3495	0.3367
		SD	0.0301487	0.058934	0.0321256	0.0239214
		SE	0.00953386	0.0186366	0.010159	0.00756461
